# Supplementary material
Source: HighWire-hosted journal article supplement (https://www.cmajopen.ca/highwire/filestream/81280/field_highwire_adjunct_files/0/2018-0165-1-at.pdf)
Supplement: 2018-0165-1-at.pdf [file 2018-0165-1-at.pdf]

## Appendix 1 (as supplied by the authors): Randomisation of eligible clinics

Randomisation of the Eligible 24 Clinics by Panel Size and Provider FTE

Three strata of eight clinics each: panel size  $\leq 2\ 754$ , panel size from 2 755 to 6 576, and panel size  $\geq 6\ 577$ . Clinics were allocated to intervention or control, 12 clinics to each arm. Nurses/ Nurse Practitioners (RN), Dietitians (RD), Mental Health Workers (MHW)

| Intervention Clinic | Panel Size | RN FTE | RD FTE | MHW FTE | Control Clinic | Panel Size | RN FTE | RD FTE | MHW FTE |
|---------------------|------------|--------|--------|---------|----------------|------------|--------|--------|---------|
| P                   | 2754       | 0.4    | 0.1    | 0.3     | A              | 2049       | 0.5    | 0.04   | *       |
| M                   | 2532       | 0.5    | 0.05   | 0.1     | I              | 2194       | 0.5    | 0.1    | 0.5     |
| V                   | 1834       | 0.5    | 0.1    | *       | Q              | 2418       | 0.5    | 0.05   | *       |
| O                   | 2152       | 0.5    | 0.1    | 0.1     | X              | 2735       | 0.6    | 0.05   | *       |
| S                   | 5349       | 0.5    | 0.05   | *       | H              | 6120       | 1      | 0.18   | 0.3     |
| D                   | 4438       | 1      | 0.1    | 0.4     | J              | 3893       | 1      | 0.1    | 0.2     |
| U                   | 5649       | 0.85   | 0.15   | 0.2     | L              | 3281       | 0.6    | 0.13   | 0.1     |
| N                   | 6229       | 1      | 0.15   | 0.2     | R              | 6576       | 1.2    | *      | 0.4     |
| C                   | 11899      | 1      | 0.2    | 0.4     | B              | 10336      | 1      | 0.18   | 0.45    |
| G                   | 8476       | 1.8    | 0.1    | 0.2     | E              | 9162       | 1.4    | 0.15   | 0.5     |
| F                   | 9677       | 1.8    | 0.2    | 0.5     | W              | 13598      | 1      | 0.2    | 0.2     |
| T                   | 11684      | 1      | 0.18   | 0.4     | K              | 13640      | 2.8    | 0.2    | 0.6     |

\* Supported by off-site referral
